# Supplementary material
Source: PubMed Central journal article supplement (PMC4524119)
Supplement: MCB.00019-15_zmb999100906so1.pdf [file MCB.00019-15_zmb999100906so1.pdf]

## Supplemental Movies

**Movie S1:** Time-lapse imaging of renal carcinoma cells. 786-0 cells were transiently transfected with control siRNA (*left panel*) or SLFN5 siRNA (*right panel*). 48 hours after transfection, the cells were transferred to a Nikon Biostation incubator widefield microscope and time-lapse images were acquired at 10-minute interval for 12 hours to generate 72 frames (12 hrs). To create a large field of view, the image shown is made out of 9 separate images (3x3 montage).

**Movie S2:** Time-lapse imaging of renal carcinoma cells. 786-0 cells were transiently transfected with control siRNA (*left panel*) or SLFN5 siRNA (*right panel*), as indicated. 48 hours after transfection, the cells were transferred to a Nikon Biostation incubator widefield microscope and time-lapse images were acquired at 10-minute interval for 8 hours to generate 48 frames (8 hrs).
